# Supplementary material for: Access to routinely collected health data for clinical trials – review of successful data requests to UK registries
Source: Trials. 2020 May 12;21:398. doi: 10.1186/s13063-020-04329-8 (PMC7218527; doi:10.1186/s13063-020-04329-8)
Supplement: Supplementary file 1 — Additional file 1: Table S1. Registries searched and approached. [file 13063_2020_4329_MOESM1_ESM.docx]

**Table S1. Registries searched and approached**

| **Registry (potential source of RCHD)**  **(n=74)** | **Release register available (n=13)** | **Correspondence if release register unavailable (n=61)** | | | |
| --- | --- | --- | --- | --- | --- |
| **List of trials provided (n=8)** | **No trials known (n=38)** | **Uncertain (n=4)** | **No response (n=11)** |
| Bowel Screening Wales |  |  |  | **x** |  |
| British Association of Urological Surgeons |  |  |  |  | **x** |
| British Thoracic Society, multiple audits |  |  | **x** |  |  |
| Clinical Practice Research Datalink (CPRD) | **x 1** |  |  |  |  |
| CORECT-R, multiple datasets |  |  | **x** |  |  |
| Department of Health (DOH) |  |  |  | **x** |  |
| Endocrine and Thyroid National Audit |  |  |  |  | **x** |
| Falls and Fragility Fractures Audit programme (FFFAP) |  | **x** |  |  |  |
| Head and Neck Cancer Audit |  |  | **x** |  |  |
| Honest Broker Service, Northern Ireland Statistics and Research Agency (HBS) | **x 2** |  | **x** |  |  |
| Inflammatory Bowel Disease Registry |  |  | **x** |  |  |
| Information Services Division, Scotland (ISD-Scotland) 6  <https://www.isdscotland.org/> | **x 1** |  |  |  |  |
| Intensive Care National Audit & Research Centre (ICNARC), multiple audits | **X3** |  |  |  |  |
| Investigation and Detection of urological Neoplasia in patients referred with suspected Urinary Tract Cancer (IDENTIFY) |  |  | **x** |  |  |
| Learning Disabilities Mortality Review Programme (LeDeR) |  |  | **x** |  |  |
| Mothers and Babies: Reducing Risk through Audits and Confidential Enquiries (MMBRACE-UK) |  |  | **x** |  |  |
| National Asthma and Chronic Obstructive Pulmonary Disease (COPD) Audit Programme (NACAP) |  |  | **x** |  |  |
| National Audit of Breast Cancer in Older People (NABCOP) |  |  | **x** |  |  |
| National Audit of Cardiac Rehabilitation |  |  | **x** |  |  |
| National Audit of Care at the End of Life (NACEL) |  |  | **x** |  |  |
| National Audit of Dementia |  |  | **x** |  |  |
| National Audit of Intermediate Care (NAIC) |  |  | **x** |  |  |
| National Audit of Seizures and Epilepsies in Children and Young People (Epilepsy12) |  |  |  |  | **x** |
| National Audit of Seizure management in Hospitals (NASH) |  |  |  |  | **x** |
| National Audit of Small Bowel Obstruction (NASBO) |  |  |  |  | **x** |
| National Audit Project of the Royal College of Anaesthetists |  |  | **x** |  |  |
| National Bariatric Surgery Registry (NBSR) |  |  | **x** |  |  |
| National Cancer Diagnosis Audit (NCDA) |  |  | **x** |  |  |
| National Cardiac Audit Programme (NCAP) |  |  |  |  | **x** |
| National Child Mortality Database |  |  | **x** |  |  |
| National Clinical Audit of Anxiety and Depression (NCAAD) |  |  | **x** |  |  |
| National Clinical Audit of Psychosis |  |  | **x** |  |  |
| National Clinical Audit of Specialist Rehabilitation for Patients with Complex Needs following Major Injury (NCASRI) |  |  |  |  | **x** |
| National Confidential Enquiry into Patient Outcome and Death (NCEPOD) |  |  | **x** |  |  |
| National Confidential Inquiry into Suicide and Safety in Mental Health (NCISH) |  |  | **x** |  |  |
| National Early Inflammatory Arthritis Audit (NEIAA) |  |  | **x** |  |  |
| National Emergency Laparotomy Audit (NELA) | **x** | **x** |  |  |  |
| National Institute for Cardiovascular Outcomes Research (NICOR) |  |  | **x 2** |  |  |
| National Joint Registry | **x 4** |  |  |  |  |
| National Lung Cancer Audit (NLCA) |  |  | **x** |  |  |
| National Maternity and Perinatal Audit (NMPA) |  |  | **x** |  |  |
| National Ophthalmology Audit (NOD) |  |  | **x** |  |  |
| National Paediatric Diabetes Audit (NPDA) |  |  | **x** |  |  |
| National Prostate Cancer Audit |  |  | **x** |  |  |
| National Vascular Registry |  |  | **x** |  |  |
| Neonatal Research Database (NNRD)/ Neonatal Intensive and Special Care (NNAP) | **x** | **x** |  |  |  |
| Neurosurgical National Audit Programme (NNAP) |  |  | **x** |  |  |
| NHS Blood and Transplant (NHSBT) |  | **x** |  |  |  |
| NHS Digital6  <https://digital.nhs.uk/> | **X5** |  |  |  |  |
| NHS Wales Informatics Service (NWIS) |  | **x** |  |  |  |
| Northern Ireland Cancer Registry (NICR) |  |  | **x 2** |  |  |
| Northern Ireland Registry of Self-harm |  |  | **x** |  |  |
| NorthWest EHealth (NWEH) |  |  |  | **x** |  |
| Office for National Statistics | **x** |  |  |  |  |
| Out-of-Hospital Cardiac Arrest Outcomes (OHCAO) Registry |  | **x** |  |  |  |
| Paediatric Intensive Care Audit Network (PICANet) | **x 3** | **x** |  |  |  |
| Perioperative Quality Improvement Programme |  |  | **x** |  |  |
| Prescribing Observatory for Mental Health (POMH-UK) |  |  | **x** |  |  |
| Progressive multifocal leukoencephalopathy following Natalizumab |  |  |  |  | **x** |
| Public Health England (PHE) 6  <https://www.gov.uk/government/organisations/public-health-england> | **x 5** |  |  |  |  |
| Public Health Wales (PHW) |  |  |  | **x** |  |
| Qresearch |  |  | **x** |  |  |
| ResearchOne |  | **x** |  |  |  |
| Royal College of Emergency Medicine, multiple audits |  |  | **x** |  |  |
| Royal College of General Practitioners (RCGP) Research and Surveillance Centre | **x** |  | **x** |  |  |
| Secure Anonymised Information Linkage (SAIL) 6  <https://saildatabank.com/> | **x** | **x** |  |  |  |
| Sentinel Stroke National Audit programme (SSNAP) |  |  |  |  | **x** |
| Serious Hazards of Transfusion (SHOT) |  |  |  |  | **x** |
| Society for Acute Medicine's Benchmarking Audit (SAMBA) |  |  | **x** |  |  |
| The Health Improvement Network (THIN) |  |  | **x** |  |  |
| Trauma Audit and Research Network - Major Trauma Audit (TARN) |  | **x** |  |  |  |
| UK Cystic Fibrosis Registry (UKCFR) |  | **x** |  |  |  |
| UK Parkinson’s Audit |  |  |  |  | **x** |
| UK Renal Registry (UKRR) |  | **x** |  |  |  |

Footnote: 1Since 2015, 2Although registry staff informed us that no trials had accessed the data, we identified one or more trials, 3Since 2013, 4Since 2010, 5Since 2014, 6website given of the top 4 giving data to clinical trials in 2013-2018
